# Supplementary material for: Application of Modified NSGA-II to the Transit Network Design Problem
Source: Hindawi journal article supplement (doi:10.1155/2020/3753601), 2020-08-01
Supplement: f1 [file 3753601.f1.zip]

Archive with 1,007 entries (1,003 files):
- Supportdata/Mandl/
- Supportdata/Mandl/mandl_approximate_pareto_front.xls
- Supportdata/Mandl/mandl_solution_1_19routes.txt
- Supportdata/Mandl/mandl_solution_10_13routes.txt
- Supportdata/Mandl/mandl_solution_11_12routes.txt
- Supportdata/Mandl/mandl_solution_12_13routes.txt
- Supportdata/Mandl/mandl_solution_13_13routes.txt
- Supportdata/Mandl/mandl_solution_14_12routes.txt
- Supportdata/Mandl/mandl_solution_15_11routes.txt
- Supportdata/Mandl/mandl_solution_16_11routes.txt
- Supportdata/Mandl/mandl_solution_17_10routes.txt
- Supportdata/Mandl/mandl_solution_18_9routes.txt
- Supportdata/Mandl/mandl_solution_19_9routes.txt
- Supportdata/Mandl/mandl_solution_2_17routes.txt
- Supportdata/Mandl/mandl_solution_20_9routes.txt
- Supportdata/Mandl/mandl_solution_21_8routes.txt
- Supportdata/Mandl/mandl_solution_22_8routes.txt
- Supportdata/Mandl/mandl_solution_23_8routes.txt
- Supportdata/Mandl/mandl_solution_24_7routes.txt
- Supportdata/Mandl/mandl_solution_25_7routes.txt
- Supportdata/Mandl/mandl_solution_26_8routes.txt
- Supportdata/Mandl/mandl_solution_27_6routes.txt
- Supportdata/Mandl/mandl_solution_28_7routes.txt
- Supportdata/Mandl/mandl_solution_29_7routes.txt
- Supportdata/Mandl/mandl_solution_3_15routes.txt
- Supportdata/Mandl/mandl_solution_30_6routes.txt
- Supportdata/Mandl/mandl_solution_31_8routes.txt
- Supportdata/Mandl/mandl_solution_32_7routes.txt
- Supportdata/Mandl/mandl_solution_33_7routes.txt
- Supportdata/Mandl/mandl_solution_34_6routes.txt
- Supportdata/Mandl/mandl_solution_35_7routes.txt
- Supportdata/Mandl/mandl_solution_36_7routes.txt
- Supportdata/Mandl/mandl_solution_37_7routes.txt
- Supportdata/Mandl/mandl_solution_38_7routes.txt
- Supportdata/Mandl/mandl_solution_39_6routes.txt
- Supportdata/Mandl/mandl_solution_4_15routes.txt
- Supportdata/Mandl/mandl_solution_40_6routes.txt
- Supportdata/Mandl/mandl_solution_41_6routes.txt
- Supportdata/Mandl/mandl_solution_42_6routes.txt
- Supportdata/Mandl/mandl_solution_43_6routes.txt
- Supportdata/Mandl/mandl_solution_44_6routes.txt
- Supportdata/Mandl/mandl_solution_45_6routes.txt
- Supportdata/Mandl/mandl_solution_46_6routes.txt
- Supportdata/Mandl/mandl_solution_47_5routes.txt
- Supportdata/Mandl/mandl_solution_48_5routes.txt
- Supportdata/Mandl/mandl_solution_49_5routes.txt
- Supportdata/Mandl/mandl_solution_5_14routes.txt
- Supportdata/Mandl/mandl_solution_50_5routes.txt
- Supportdata/Mandl/mandl_solution_51_5routes.txt
- Supportdata/Mandl/mandl_solution_52_5routes.txt
- Supportdata/Mandl/mandl_solution_53_5routes.txt
- Supportdata/Mandl/mandl_solution_54_5routes.txt
- Supportdata/Mandl/mandl_solution_55_4routes.txt
- Supportdata/Mandl/mandl_solution_56_4routes.txt
- Supportdata/Mandl/mandl_solution_57_4routes.txt
- Supportdata/Mandl/mandl_solution_58_4routes.txt
- Supportdata/Mandl/mandl_solution_59_4routes.txt
- Supportdata/Mandl/mandl_solution_6_14routes.txt
- Supportdata/Mandl/mandl_solution_60_4routes.txt
- Supportdata/Mandl/mandl_solution_61_4routes.txt
- Supportdata/Mandl/mandl_solution_62_4routes.txt
- Supportdata/Mandl/mandl_solution_63_4routes.txt
- Supportdata/Mandl/mandl_solution_64_4routes.txt
- Supportdata/Mandl/mandl_solution_65_4routes.txt
- Supportdata/Mandl/mandl_solution_66_4routes.txt
- Supportdata/Mandl/mandl_solution_67_4routes.txt
- Supportdata/Mandl/mandl_solution_68_4routes.txt
- Supportdata/Mandl/mandl_solution_69_4routes.txt
- Supportdata/Mandl/mandl_solution_7_14routes.txt
- Supportdata/Mandl/mandl_solution_70_4routes.txt
- Supportdata/Mandl/mandl_solution_71_4routes.txt
- Supportdata/Mandl/mandl_solution_72_3routes.txt
- Supportdata/Mandl/mandl_solution_73_3routes.txt
- Supportdata/Mandl/mandl_solution_74_3routes.txt
- Supportdata/Mandl/mandl_solution_75_3routes.txt
- Supportdata/Mandl/mandl_solution_76_3routes.txt
- Supportdata/Mandl/mandl_solution_77_3routes.txt
- Supportdata/Mandl/mandl_solution_78_3routes.txt
- Supportdata/Mandl/mandl_solution_79_3routes.txt
- Supportdata/Mandl/mandl_solution_8_14routes.txt
- Supportdata/Mandl/mandl_solution_80_3routes.txt
- Supportdata/Mandl/mandl_solution_81_3routes.txt
- Supportdata/Mandl/mandl_solution_82_3routes.txt
- Supportdata/Mandl/mandl_solution_83_3routes.txt
- Supportdata/Mandl/mandl_solution_84_3routes.txt
- Supportdata/Mandl/mandl_solution_85_3routes.txt
- Supportdata/Mandl/mandl_solution_86_3routes.txt
- Supportdata/Mandl/mandl_solution_87_3routes.txt
- Supportdata/Mandl/mandl_solution_88_3routes.txt
- Supportdata/Mandl/mandl_solution_89_3routes.txt
- Supportdata/Mandl/mandl_solution_9_13routes.txt
- Supportdata/Mandl/mandl_solution_90_3routes.txt
- Supportdata/Mandl/mandl_solution_91_3routes.txt
- Supportdata/Mumford1/
- Supportdata/Mumford1/m1_approximate_pareto_front.xls
- Supportdata/Mumford1/m1_solution_1_48routes.txt
- Supportdata/Mumford1/m1_solution_10_45routes.txt
- Supportdata/Mumford1/m1_solution_100_21routes.txt
- Supportdata/Mumford1/m1_solution_101_21routes.txt
- Supportdata/Mumford1/m1_solution_102_21routes.txt
- Supportdata/Mumford1/m1_solution_103_21routes.txt
- Supportdata/Mumford1/m1_solution_104_21routes.txt
- Supportdata/Mumford1/m1_solution_105_21routes.txt
- Supportdata/Mumford1/m1_solution_106_21routes.txt
- Supportdata/Mumford1/m1_solution_107_20routes.txt
- Supportdata/Mumford1/m1_solution_108_20routes.txt
- Supportdata/Mumford1/m1_solution_109_19routes.txt
- Supportdata/Mumford1/m1_solution_11_44routes.txt
- Supportdata/Mumford1/m1_solution_110_19routes.txt
- Supportdata/Mumford1/m1_solution_111_19routes.txt
- Supportdata/Mumford1/m1_solution_112_19routes.txt
- Supportdata/Mumford1/m1_solution_113_19routes.txt
- Supportdata/Mumford1/m1_solution_114_18routes.txt
- Supportdata/Mumford1/m1_solution_115_18routes.txt
- Supportdata/Mumford1/m1_solution_116_20routes.txt
- Supportdata/Mumford1/m1_solution_117_20routes.txt
- Supportdata/Mumford1/m1_solution_118_18routes.txt
- Supportdata/Mumford1/m1_solution_119_18routes.txt
- Supportdata/Mumford1/m1_solution_12_43routes.txt
- Supportdata/Mumford1/m1_solution_120_17routes.txt
- Supportdata/Mumford1/m1_solution_121_17routes.txt
- Supportdata/Mumford1/m1_solution_122_19routes.txt
- Supportdata/Mumford1/m1_solution_123_18routes.txt
- Supportdata/Mumford1/m1_solution_124_18routes.txt
- Supportdata/Mumford1/m1_solution_125_16routes.txt
- Supportdata/Mumford1/m1_solution_126_16routes.txt
- Supportdata/Mumford1/m1_solution_127_18routes.txt
- Supportdata/Mumford1/m1_solution_128_17routes.txt
- Supportdata/Mumford1/m1_solution_129_17routes.txt
- Supportdata/Mumford1/m1_solution_13_44routes.txt
- Supportdata/Mumford1/m1_solution_130_15routes.txt
- Supportdata/Mumford1/m1_solution_131_17routes.txt
- Supportdata/Mumford1/m1_solution_132_16routes.txt
- Supportdata/Mumford1/m1_solution_133_14routes.txt
- Supportdata/Mumford1/m1_solution_134_14routes.txt
- Supportdata/Mumford1/m1_solution_135_16routes.txt
- Supportdata/Mumford1/m1_solution_136_13routes.txt
- Supportdata/Mumford1/m1_solution_137_15routes.txt
- Supportdata/Mumford1/m1_solution_138_12routes.txt
- Supportdata/Mumford1/m1_solution_139_13routes.txt
- Supportdata/Mumford1/m1_solution_14_43routes.txt
- Supportdata/Mumford1/m1_solution_140_11routes.txt
- Supportdata/Mumford1/m1_solution_141_13routes.txt
- Supportdata/Mumford1/m1_solution_142_12routes.txt
- Supportdata/Mumford1/m1_solution_143_14routes.txt
- Supportdata/Mumford1/m1_solution_144_12routes.txt
- Supportdata/Mumford1/m1_solution_145_12routes.txt
- Supportdata/Mumford1/m1_solution_146_13routes.txt
- Supportdata/Mumford1/m1_solution_147_11routes.txt
- Supportdata/Mumford1/m1_solution_148_11routes.txt
- Supportdata/Mumford1/m1_solution_149_11routes.txt
- Supportdata/Mumford1/m1_solution_15_43routes.txt
- Supportdata/Mumford1/m1_solution_150_11routes.txt
- Supportdata/Mumford1/m1_solution_151_13routes.txt
- Supportdata/Mumford1/m1_solution_152_13routes.txt
- Supportdata/Mumford1/m1_solution_153_11routes.txt
- Supportdata/Mumford1/m1_solution_154_11routes.txt
- Supportdata/Mumford1/m1_solution_155_11routes.txt
- Supportdata/Mumford1/m1_solution_156_12routes.txt
- Supportdata/Mumford1/m1_solution_157_11routes.txt
- Supportdata/Mumford1/m1_solution_158_11routes.txt
- Supportdata/Mumford1/m1_solution_159_12routes.txt
- Supportdata/Mumford1/m1_solution_16_42routes.txt
- Supportdata/Mumford1/m1_solution_160_11routes.txt
- Supportdata/Mumford1/m1_solution_161_11routes.txt
- Supportdata/Mumford1/m1_solution_162_11routes.txt
- Supportdata/Mumford1/m1_solution_163_11routes.txt
- Supportdata/Mumford1/m1_solution_164_10routes.txt
- Supportdata/Mumford1/m1_solution_165_10routes.txt
- Supportdata/Mumford1/m1_solution_166_10routes.txt
- Supportdata/Mumford1/m1_solution_167_10routes.txt
- Supportdata/Mumford1/m1_solution_168_11routes.txt
- Supportdata/Mumford1/m1_solution_169_10routes.txt
- Supportdata/Mumford1/m1_solution_17_42routes.txt
- Supportdata/Mumford1/m1_solution_170_10routes.txt
- Supportdata/Mumford1/m1_solution_171_9routes.txt
- Supportdata/Mumford1/m1_solution_172_8routes.txt
- Supportdata/Mumford1/m1_solution_173_10routes.txt
- Supportdata/Mumford1/m1_solution_174_10routes.txt
- Supportdata/Mumford1/m1_solution_175_9routes.txt
- Supportdata/Mumford1/m1_solution_176_9routes.txt
- Supportdata/Mumford1/m1_solution_177_9routes.txt
- Supportdata/Mumford1/m1_solution_178_6routes.txt
- Supportdata/Mumford1/m1_solution_179_6routes.txt
- Supportdata/Mumford1/m1_solution_18_41routes.txt
- Supportdata/Mumford1/m1_solution_180_6routes.txt
- Supportdata/Mumford1/m1_solution_181_7routes.txt
- Supportdata/Mumford1/m1_solution_182_6routes.txt
- Supportdata/Mumford1/m1_solution_183_8routes.txt
- Supportdata/Mumford1/m1_solution_184_8routes.txt
- Supportdata/Mumford1/m1_solution_185_8routes.txt
- Supportdata/Mumford1/m1_solution_186_8routes.txt
- Supportdata/Mumford1/m1_solution_187_8routes.txt
- Supportdata/Mumford1/m1_solution_188_5routes.txt
- Supportdata/Mumford1/m1_solution_189_5routes.txt
- Supportdata/Mumford1/m1_solution_19_41routes.txt
- Supportdata/Mumford1/m1_solution_190_5routes.txt
- Supportdata/Mumford1/m1_solution_191_8routes.txt
- Supportdata/Mumford1/m1_solution_192_5routes.txt
- Supportdata/Mumford1/m1_solution_193_6routes.txt
- Supportdata/Mumford1/m1_solution_194_5routes.txt
- Supportdata/Mumford1/m1_solution_195_6routes.txt
- Supportdata/Mumford1/m1_solution_196_5routes.txt
- Supportdata/Mumford1/m1_solution_197_5routes.txt
- Supportdata/Mumford1/m1_solution_198_5routes.txt
- Supportdata/Mumford1/m1_solution_199_5routes.txt
- Supportdata/Mumford1/m1_solution_2_48routes.txt
- Supportdata/Mumford1/m1_solution_20_41routes.txt
- Supportdata/Mumford1/m1_solution_200_4routes.txt
- Supportdata/Mumford1/m1_solution_201_4routes.txt
- Supportdata/Mumford1/m1_solution_202_4routes.txt
- Supportdata/Mumford1/m1_solution_203_4routes.txt
- Supportdata/Mumford1/m1_solution_204_5routes.txt
- Supportdata/Mumford1/m1_solution_205_4routes.txt
- Supportdata/Mumford1/m1_solution_206_4routes.txt
- Supportdata/Mumford1/m1_solution_207_4routes.txt
- Supportdata/Mumford1/m1_solution_208_4routes.txt
- Supportdata/Mumford1/m1_solution_209_4routes.txt
- Supportdata/Mumford1/m1_solution_21_41routes.txt
- Supportdata/Mumford1/m1_solution_210_4routes.txt
- Supportdata/Mumford1/m1_solution_211_4routes.txt
- Supportdata/Mumford1/m1_solution_212_4routes.txt
- Supportdata/Mumford1/m1_solution_213_4routes.txt
- Supportdata/Mumford1/m1_solution_214_4routes.txt
- Supportdata/Mumford1/m1_solution_215_4routes.txt
- Supportdata/Mumford1/m1_solution_216_4routes.txt
- Supportdata/Mumford1/m1_solution_217_4routes.txt
- Supportdata/Mumford1/m1_solution_218_4routes.txt
- Supportdata/Mumford1/m1_solution_219_4routes.txt
- Supportdata/Mumford1/m1_solution_22_40routes.txt
- Supportdata/Mumford1/m1_solution_220_4routes.txt
- Supportdata/Mumford1/m1_solution_221_4routes.txt
- Supportdata/Mumford1/m1_solution_222_4routes.txt
- Supportdata/Mumford1/m1_solution_223_4routes.txt
- Supportdata/Mumford1/m1_solution_224_4routes.txt
- Supportdata/Mumford1/m1_solution_225_3routes.txt
- Supportdata/Mumford1/m1_solution_226_3routes.txt
- Supportdata/Mumford1/m1_solution_227_3routes.txt
- Supportdata/Mumford1/m1_solution_228_3routes.txt
- Supportdata/Mumford1/m1_solution_229_3routes.txt
- Supportdata/Mumford1/m1_solution_23_40routes.txt
- Supportdata/Mumford1/m1_solution_230_3routes.txt
- Supportdata/Mumford1/m1_solution_231_3routes.txt
- Supportdata/Mumford1/m1_solution_232_3routes.txt
- Supportdata/Mumford1/m1_solution_233_3routes.txt
- Supportdata/Mumford1/m1_solution_234_3routes.txt
- Supportdata/Mumford1/m1_solution_235_3routes.txt
- Supportdata/Mumford1/m1_solution_236_3routes.txt
- Supportdata/Mumford1/m1_solution_237_3routes.txt
- Supportdata/Mumford1/m1_solution_238_3routes.txt
- Supportdata/Mumford1/m1_solution_239_3routes.txt
- Supportdata/Mumford1/m1_solution_24_40routes.txt
- Supportdata/Mumford1/m1_solution_240_3routes.txt
- Supportdata/Mumford1/m1_solution_241_3routes.txt
- Supportdata/Mumford1/m1_solution_242_3routes.txt
- Supportdata/Mumford1/m1_solution_243_3routes.txt
- Supportdata/Mumford1/m1_solution_244_3routes.txt
- Supportdata/Mumford1/m1_solution_245_3routes.txt
- Supportdata/Mumford1/m1_solution_246_3routes.txt
- Supportdata/Mumford1/m1_solution_247_3routes.txt
- Supportdata/Mumford1/m1_solution_248_3routes.txt
- Supportdata/Mumford1/m1_solution_249_3routes.txt
- Supportdata/Mumford1/m1_solution_25_39routes.txt
- Supportdata/Mumford1/m1_solution_250_3routes.txt
- Supportdata/Mumford1/m1_solution_251_3routes.txt
- Supportdata/Mumford1/m1_solution_252_3routes.txt
- Supportdata/Mumford1/m1_solution_26_39routes.txt
- Supportdata/Mumford1/m1_solution_27_38routes.txt
- Supportdata/Mumford1/m1_solution_28_38routes.txt
- Supportdata/Mumford1/m1_solution_29_38routes.txt
- Supportdata/Mumford1/m1_solution_3_47routes.txt
- Supportdata/Mumford1/m1_solution_30_37routes.txt
- Supportdata/Mumford1/m1_solution_31_37routes.txt
- Supportdata/Mumford1/m1_solution_32_37routes.txt
- Supportdata/Mumford1/m1_solution_33_37routes.txt
- Supportdata/Mumford1/m1_solution_34_36routes.txt
- Supportdata/Mumford1/m1_solution_35_37routes.txt
- Supportdata/Mumford1/m1_solution_36_36routes.txt
- Supportdata/Mumford1/m1_solution_37_36routes.txt
- Supportdata/Mumford1/m1_solution_38_36routes.txt
- Supportdata/Mumford1/m1_solution_39_35routes.txt
- Supportdata/Mumford1/m1_solution_4_47routes.txt
- Supportdata/Mumford1/m1_solution_40_35routes.txt
- Supportdata/Mumford1/m1_solution_41_35routes.txt
- Supportdata/Mumford1/m1_solution_42_34routes.txt
- Supportdata/Mumford1/m1_solution_43_34routes.txt
- Supportdata/Mumford1/m1_solution_44_34routes.txt
- Supportdata/Mumford1/m1_solution_45_33routes.txt
- Supportdata/Mumford1/m1_solution_46_33routes.txt
- Supportdata/Mumford1/m1_solution_47_33routes.txt
- Supportdata/Mumford1/m1_solution_48_32routes.txt
- Supportdata/Mumford1/m1_solution_49_32routes.txt
- Supportdata/Mumford1/m1_solution_5_47routes.txt
- Supportdata/Mumford1/m1_solution_50_31routes.txt
- Supportdata/Mumford1/m1_solution_51_31routes.txt
- Supportdata/Mumford1/m1_solution_52_32routes.txt
- Supportdata/Mumford1/m1_solution_53_31routes.txt
- Supportdata/Mumford1/m1_solution_54_31routes.txt
- Supportdata/Mumford1/m1_solution_55_31routes.txt
- Supportdata/Mumford1/m1_solution_56_30routes.txt
[truncated: 707 more entries]
