# Supplementary material for: Application of Modified NSGA-II to the Transit Network Design Problem
Source: Hindawi journal article supplement (doi:10.1155/2020/3753601), 2020-08-01
Supplement: f1 [file 3753601.f1.zip › Supportdata/Mandl/mandl_approximate_pareto_front.xls]

## Sheet: Sheet1
		#	d0	d1	d2	dun	ATT	TRL	|R|
		1	1	0	0	0	10.0058	506	19
		2	1	0	0	0	10.0071	499	17
		3	1	0	0	0	10.0083	470	15
		4	1	0	0	0	10.0096	452	15
		5	1	0	0	0	10.0109	441	14
		6	0.999358	0.000642261	0	0	10.0135	397	14
		7	0.998715	0.00128452	0	0	10.0212	385	14
		8	0.997431	0.00256904	0	0	10.0244	378	14
		9	0.997431	0.00256904	0	0	10.0257	367	13
		10	0.997431	0.00256904	0	0	10.0276	355	13
		11	0.998073	0.00192678	0	0	10.0295	348	12
		12	0.996146	0.00385356	0	0	10.0328	340	13
		13	0.996146	0.00385356	0	0	10.0366	339	13
		14	0.995504	0.00449583	0	0	10.0373	309	12
		15	0.99422	0.00578035	0	0	10.0417	293	11
		16	0.994862	0.00513809	0	0	10.0687	286	11
		17	0.987797	0.012203	0	0	10.0739	278	10
		18	0.990366	0.00963391	0	0	10.0751	263	9
		19	0.991008	0.00899165	0	0	10.0873	252	9
		20	0.989082	0.0109184	0	0	10.0931	251	9
		21	0.98587	0.0141297	0	0	10.0944	233	8
		22	0.982659	0.017341	0	0	10.1259	218	8
		23	0.98009	0.0199101	0	0	10.1458	216	8
		24	0.97431	0.0256904	0	0	10.1522	209	7
		25	0.973667	0.0263327	0	0	10.1747	206	7
		26	0.969814	0.0301863	0	0	10.1805	199	8
		27	0.969171	0.0308285	0	0	10.1908	195	6
		28	0.964033	0.0353243	0.000642261	1.11022e-16	10.201	194	7
		29	0.96596	0.0333976	0.000642261	0	10.2171	191	7
		30	0.963391	0.0353243	0.00128452	0	10.2216	188	6
		31	0.956969	0.0430315	0	0	10.246	187	8
		32	0.956326	0.0436737	0	0	10.2479	185	7
		33	0.95183	0.0475273	0.000642261	0	10.2498	183	7
		34	0.958253	0.0411047	0.000642261	0	10.2556	177	6
		35	0.956969	0.0430315	0	0	10.2563	173	7
		36	0.955684	0.0436737	0.000642261	0	10.271	170	7
		37	0.949261	0.0507386	0	0	10.2768	169	7
		38	0.946692	0.0533076	0	0	10.2871	167	7
		39	0.94605	0.0526654	0.00128452	0	10.3109	165	6
		40	0.94605	0.0526654	0.00128452	0	10.3154	161	6
		41	0.938985	0.0603725	0.000642261	1.11022e-16	10.3314	156	6
		42	0.947335	0.0488118	0.00385356	0	10.3507	155	6
		43	0.944766	0.0539499	0.00128452	0	10.3552	153	6
		44	0.938343	0.0603725	0.00128452	0	10.3565	148	6
		45	0.935774	0.0629416	0.00128452	0	10.3667	146	6
		46	0.933847	0.0610148	0.00513809	0	10.3956	143	6
		47	0.928067	0.0680796	0.00385356	0	10.4155	140	5
		48	0.93192	0.0667951	0.00128452	0	10.4399	139	5
		49	0.929351	0.0693642	0.00128452	0	10.4502	137	5
		50	0.928067	0.0680796	0.00385356	0	10.4541	135	5
		51	0.924855	0.0712909	0.00385356	0	10.4676	133	5
		52	0.925498	0.0674374	0.00706487	0	10.4862	132	5
		53	0.92614	0.0667951	0.00706487	0	10.5048	131	5
		54	0.918433	0.0745022	0.00706487	0	10.5228	130	5
		55	0.910726	0.0822094	0.00706487	0	10.5639	124	4
		56	0.908157	0.0847784	0.00706487	0	10.5742	122	4
		57	0.908157	0.0745022	0.017341	0	10.6487	118	4
		58	0.905588	0.0770713	0.017341	0	10.659	116	4
		59	0.897238	0.0956969	0.00706487	0	10.7495	114	4
		60	0.921002	0.0732177	0.00578035	0	10.7585	112	4
		61	0.918433	0.0757868	0.00578035	0	10.7688	110	4
		62	0.894669	0.0879897	0.017341	0	10.8343	108	4
		63	0.860629	0.12781	0.0115607	0	10.8645	107	4
		64	0.904303	0.0783558	0.017341	0	10.8793	106	4
		65	0.855491	0.141297	0.0032113	0	10.8838	105	4
		66	0.850996	0.135517	0.0134875	0	10.9422	99	4
		67	0.85806	0.128452	0.0134875	0	11.0276	96	4
		68	0.867052	0.121387	0.0115607	0	11.1644	95	4
		69	0.867052	0.121387	0.0115607	0	11.167	94	4
		70	0.863198	0.13359	0.0032113	0	11.1869	92	4
		71	0.85806	0.138728	0.0032113	0	11.1972	88	4
		72	0.878613	0.118176	0.0032113	0	11.3096	86	3
		73	0.850996	0.143866	0.00513809	0	11.429	85	3
		74	0.833012	0.163776	0.0032113	0	11.4432	84	3
		75	0.840077	0.156712	0.0032113	0	11.5286	81	3
		76	0.800899	0.193963	0.00513809	0	11.6808	80	3
		77	0.818882	0.177906	0.0032113	0	11.7373	79	3
		78	0.779705	0.215157	0.00513809	0	11.8895	78	3
		79	0.766859	0.220295	0.0128452	0	12.0456	77	3
		80	0.734104	0.244701	0.0211946	0	12.1978	76	3
		81	0.755299	0.19589	0.0488118	1.11022e-16	13.0841	75	3
		82	0.676301	0.323699	0	0	13.1387	74	3
		83	0.734104	0.217084	0.0488118	0	13.2929	73	3
		84	0.666024	0.28131	0.0526654	0	13.799	72	3
		85	0.651895	0.29544	0.0526654	0	13.8581	71	3
		86	0.614644	0.319846	0.0655106	0	14.2601	70	3
		87	0.538215	0.40912	0.0526654	0	14.386	69	3
		88	0.524085	0.42325	0.0526654	0	14.4451	68	3
		89	0.524085	0.42325	0.0526654	0	15.1734	67	3
		90	0.473988	0.460501	0.0655106	0	15.2942	66	3
		91	0.473988	0.460501	0.0655106	0	15.4881	65	3
