# Supplementary material for: Application of Modified NSGA-II to the Transit Network Design Problem
Source: Hindawi journal article supplement (doi:10.1155/2020/3753601), 2020-08-01
Supplement: f1 [file 3753601.f1.zip › Supportdata/Mandl/mandl_solution_34_6routes.txt]

1 2 3 6 15 7 
9 15 7 10 11 13 14 
1 2 4 12 11 13 
12 11 10 8 6 4 5 
1 2 3 6 8 10 14 13 
1 2 5 4 6 8 15 7 
