# Supplementary material for: Application of Modified NSGA-II to the Transit Network Design Problem
Source: Hindawi journal article supplement (doi:10.1155/2020/3753601), 2020-08-01
Supplement: f1 [file 3753601.f1.zip › Supportdata/Mandl/mandl_solution_86_3routes.txt]

9 15 6 8 10 11 13 14 
12 4 2 3 6 15 7 
1 2 5 
