# Supplementary material for: Application of Modified NSGA-II to the Transit Network Design Problem
Source: Hindawi journal article supplement (doi:10.1155/2020/3753601), 2020-08-01
Supplement: f1 [file 3753601.f1.zip › Supportdata/Mumford1/m1_approximate_pareto_front.xls]

## Sheet: Sheet1
		#	d0	d1	d2	dun	ATT	TRL	|R|
		1	0.710353	0.289647	0	0	21.1941	3315	48
		2	0.710488	0.289512	0	0	21.1946	3297	48
		3	0.706651	0.293349	0	0	21.214	3251	47
		4	0.705338	0.294662	0	0	21.2215	3240	47
		5	0.704953	0.295047	0	0	21.2248	3234	47
		6	0.701636	0.298364	0	0	21.2414	3176	46
		7	0.698697	0.301303	0	0	21.255	3170	46
		8	0.687644	0.312356	0	0	21.2674	3139	45
		9	0.69214	0.30786	0	0	21.2719	3137	45
		10	0.693989	0.306011	0	0	21.2757	3108	45
		11	0.688781	0.311219	0	0	21.2963	3094	44
		12	0.677027	0.322412	0.000560698	0	21.3013	3068	43
		13	0.687058	0.312942	0	0	21.3089	3054	44
		14	0.675366	0.323621	0.00101237	0	21.3119	3032	43
		15	0.680703	0.318554	0.000742406	0	21.3136	3013	43
		16	0.67804	0.321218	0.000742406	0	21.3269	2957	42
		17	0.674863	0.324307	0.000830664	0	21.3453	2939	42
		18	0.667501	0.331487	0.00101237	0	21.358	2907	41
		19	0.672874	0.326383	0.000742406	-2.22045e-16	21.3625	2899	41
		20	0.671415	0.327754	0.000830664	0	21.3729	2884	41
		21	0.670709	0.328548	0.000742406	0	21.3807	2873	41
		22	0.668061	0.331196	0.000742406	0	21.3939	2819	40
		23	0.66599	0.333179	0.000830664	0	21.3985	2816	40
		24	0.665964	0.333205	0.000830664	0	21.403	2808	40
		25	0.663316	0.335853	0.000830664	0	21.4163	2754	39
		26	0.660658	0.339254	8.8258e-05	1.11022e-16	21.4484	2745	39
		27	0.658389	0.341522	8.8258e-05	0	21.4606	2716	38
		28	0.65624	0.343672	8.8258e-05	0	21.4656	2712	38
		29	0.660502	0.339498	0	0	21.4686	2699	38
		30	0.653888	0.345753	0.000358224	0	21.4712	2697	37
		31	0.657149	0.342581	0.000269966	1.11022e-16	21.4741	2685	37
		32	0.652082	0.34783	8.8258e-05	0	21.4908	2655	37
		33	0.655513	0.344487	0	0	21.4977	2645	37
		34	0.649548	0.350094	0.000358224	0	21.5048	2624	36
		35	0.645966	0.353946	8.8258e-05	-2.22045e-16	21.5254	2621	37
		36	0.647861	0.352139	0	0	21.5345	2586	36
		37	0.645774	0.354226	0	0	21.5403	2579	36
		38	0.641709	0.358203	8.8258e-05	-2.22045e-16	21.5467	2571	36
		39	0.642664	0.356978	0.000358224	0	21.5479	2530	35
		40	0.640785	0.359215	0	0	21.5694	2525	35
		41	0.636486	0.363426	8.8258e-05	-2.22045e-16	21.5711	2509	35
		42	0.637711	0.361931	0.000358224	0	21.598	2461	34
		43	0.631985	0.367927	8.8258e-05	0	21.6054	2458	34
		44	0.63388	0.36612	0	0	21.6089	2435	34
		45	0.632722	0.36692	0.000358224	0	21.6271	2407	33
		46	0.62508	0.374832	8.8258e-05	0	21.6462	2368	33
		47	0.625573	0.373285	0.00114216	1.11022e-16	21.6742	2364	33
		48	0.620049	0.379593	0.000358224	0	21.6942	2333	32
		49	0.61954	0.380371	8.8258e-05	0	21.6991	2307	32
		50	0.612864	0.387048	8.8258e-05	-2.22045e-16	21.7318	2295	31
		51	0.613243	0.386669	8.8258e-05	0	21.7331	2291	31
		52	0.61844	0.38033	0.00123042	0	21.7334	2286	32
		53	0.616732	0.38318	8.8258e-05	1.11022e-16	21.7371	2251	31
		54	0.613451	0.385319	0.00123042	0	21.7625	2232	31
		55	0.606914	0.391617	0.00146924	0	21.7867	2230	31
		56	0.604557	0.394212	0.00123042	0	21.7971	2224	30
		57	0.608425	0.390345	0.00123042	0	21.8016	2180	30
		58	0.587887	0.409284	0.00282945	1.11022e-16	21.841	2157	29
		59	0.600056	0.399856	8.8258e-05	0	21.8455	2130	29
		60	0.600316	0.398454	0.00123042	1.11022e-16	21.8593	2126	29
		61	0.576372	0.420399	0.00322921	0	21.8884	2097	30
		62	0.591749	0.40702	0.00123042	0	21.91	2059	28
		63	0.571782	0.424667	0.00355109	0	21.9212	2045	29
		64	0.569337	0.427112	0.00355109	0	21.9501	2038	29
		65	0.567748	0.4287	0.00355109	0	21.9579	2000	28
		66	0.566367	0.431011	0.00262178	1.11022e-16	21.9757	1992	27
		67	0.574451	0.424319	0.00123042	1.11022e-16	22.0025	1985	27
		68	0.582425	0.41459	0.0029852	0	22.018	1982	28
		69	0.584512	0.412503	0.0029852	0	22.0206	1964	27
		70	0.560688	0.43669	0.00262178	0	22.0245	1946	26
		71	0.557765	0.438684	0.00355109	0	22.0326	1939	27
		72	0.567266	0.431504	0.00123042	0	22.064	1901	26
		73	0.549931	0.446518	0.00355109	0	22.0933	1891	26
		74	0.545243	0.45035	0.00440771	0	22.0989	1889	26
		75	0.543353	0.453667	0.00298001	0	22.1163	1851	25
		76	0.545663	0.45131	0.00302673	0	22.1166	1843	25
		77	0.556571	0.442199	0.00123042	1.11022e-16	22.1512	1828	25
		78	0.533909	0.463064	0.00302673	0	22.1704	1802	24
		79	0.549977	0.448377	0.00164575	0	22.1931	1787	24
		80	0.53596	0.455604	0.00843643	0	22.2267	1783	24
		81	0.540617	0.450557	0.0088258	1.11022e-16	22.2274	1771	24
		82	0.526833	0.468759	0.00440771	0	22.2404	1770	24
		83	0.526911	0.468681	0.00440771	0	22.2575	1769	24
		84	0.526413	0.468126	0.00546162	0	22.2626	1755	24
		85	0.527544	0.467918	0.0045375	1.11022e-16	22.263	1747	24
		86	0.532108	0.464502	0.00339015	0	22.2704	1746	23
		87	0.533162	0.458013	0.0088258	1.11022e-16	22.2741	1718	23
		88	0.531962	0.45862	0.00941765	0	22.2881	1713	23
		89	0.508699	0.484168	0.00713333	0	22.3295	1711	23
		90	0.516019	0.479298	0.00468287	0	22.341	1694	23
		91	0.536458	0.458485	0.00505667	1.11022e-16	22.3422	1689	23
		92	0.527082	0.469528	0.00339015	0	22.3486	1686	22
		93	0.522264	0.475498	0.0022376	0	22.3501	1679	22
		94	0.515494	0.476978	0.00752789	1.11022e-16	22.354	1667	23
		95	0.519939	0.47094	0.00912173	0	22.3692	1648	22
		96	0.515661	0.474429	0.00991086	0	22.39	1639	22
		97	0.524315	0.471267	0.00441809	0	22.4086	1605	22
		98	0.522996	0.470197	0.00680625	0	22.4594	1603	22
		99	0.521673	0.471521	0.00680625	0	22.4647	1597	22
		100	0.51403	0.47622	0.00974992	0	22.4647	1593	21
		101	0.506783	0.482881	0.0103366	0	22.4777	1586	21
		102	0.499073	0.491	0.00992643	0	22.4853	1579	21
		103	0.486146	0.503408	0.0104456	0	22.511	1565	21
		104	0.523567	0.472243	0.00418966	0	22.5178	1560	21
		105	0.518251	0.474943	0.00680625	0	22.5254	1552	21
		106	0.516927	0.476266	0.00680625	0	22.5307	1546	21
		107	0.492335	0.49683	0.010835	0	22.5779	1516	20
		108	0.51443	0.480607	0.00496322	1.11022e-16	22.5998	1507	20
		109	0.497267	0.491488	0.0112451	0	22.608	1506	19
		110	0.482797	0.501306	0.0158968	0	22.6641	1484	19
		111	0.480892	0.504364	0.0147443	1.11022e-16	22.6805	1481	19
		112	0.483415	0.501659	0.014926	0	22.6831	1479	19
		113	0.481738	0.503917	0.0143445	1.11022e-16	22.6838	1467	19
		114	0.487652	0.500517	0.0118318	0	22.6899	1438	18
		115	0.485611	0.503367	0.0110219	1.11022e-16	22.7342	1426	18
		116	0.461273	0.521953	0.0167742	0	22.7536	1422	20
		117	0.465245	0.519435	0.0153206	0	22.773	1419	20
		118	0.472918	0.509514	0.0175685	0	22.7785	1410	18
		119	0.471874	0.507286	0.0208393	0	22.7982	1403	18
		120	0.478556	0.509296	0.0121485	0	22.8235	1368	17
		121	0.464409	0.515225	0.0203668	0	22.8371	1362	17
		122	0.453563	0.529735	0.0167015	-2.22045e-16	22.8607	1334	19
		123	0.45211	0.529117	0.018773	0	22.9159	1326	18
		124	0.45211	0.529304	0.0185861	0	22.9241	1296	18
		125	0.467441	0.517883	0.0146768	0	22.9774	1292	16
		126	0.450293	0.521159	0.0285489	0	22.9815	1284	16
		127	0.445843	0.534543	0.0196141	0	22.9838	1269	18
		128	0.44414	0.536162	0.0196971	0	23.0058	1248	17
		129	0.446606	0.534397	0.0189962	0	23.0343	1238	17
		130	0.4452	0.52526	0.0295405	0	23.0692	1229	15
		131	0.432994	0.540622	0.026384	0	23.0875	1209	17
		132	0.438637	0.541255	0.0201073	1.11022e-16	23.1217	1190	16
		133	0.442375	0.527726	0.0298987	1.11022e-16	23.1505	1181	14
		134	0.440454	0.527887	0.0316587	0	23.1645	1179	14
		135	0.425425	0.546307	0.0282685	0	23.1733	1161	16
		136	0.440823	0.54394	0.0152375	0	23.2164	1143	13
		137	0.417928	0.55168	0.0303919	1.11022e-16	23.3131	1097	15
		138	0.429863	0.552765	0.0173713	0	23.3607	1069	12
		139	0.421796	0.546328	0.0317937	8.30664e-05	23.5226	1056	13
		140	0.411822	0.562022	0.0261555	0	23.5826	1000	11
		141	0.391227	0.572047	0.0362585	0.000467248	23.6398	991	13
		142	0.387972	0.574934	0.0370943	1.11022e-16	23.7123	977	12
		143	0.399762	0.556711	0.043371	0.000155749	23.8047	966	14
		144	0.385018	0.567515	0.0474673	0	23.8236	958	12
		145	0.381996	0.576418	0.0415851	0	23.8373	929	12
		146	0.387614	0.558461	0.0533702	0.000555507	23.9217	928	13
		147	0.378072	0.574882	0.0470467	0	23.9472	896	11
		148	0.378321	0.57308	0.048599	1.11022e-16	23.9522	894	11
		149	0.375195	0.576258	0.0485471	0	24.0464	888	11
		150	0.375346	0.577322	0.0473323	1.11022e-16	24.0478	887	11
		151	0.363981	0.580084	0.0557791	0.000155749	24.1132	877	13
		152	0.364755	0.562957	0.0718888	0.000399757	24.1703	857	13
		153	0.383855	0.559296	0.0561788	0.000669723	24.25	840	11
		154	0.378238	0.564722	0.0563709	0.000669723	24.2528	833	11
		155	0.370471	0.563201	0.0656588	0.000669723	24.2856	830	11
		156	0.35785	0.575069	0.0669256	0.000155749	24.3304	826	12
		157	0.375434	0.560786	0.0631097	0.000669723	24.4027	808	11
		158	0.355514	0.561108	0.080943	0.00243488	24.5008	796	11
		159	0.357928	0.553326	0.0861554	0.00259063	24.5266	794	12
		160	0.353676	0.558279	0.0875468	0.000498398	24.5711	788	11
		161	0.352238	0.562173	0.0829989	0.00259063	24.5967	783	11
		162	0.348245	0.564166	0.0849977	0.00259063	24.6456	782	11
		163	0.330293	0.573932	0.0952356	0.000539932	24.7642	763	11
		164	0.338319	0.555439	0.103807	0.00243488	24.8332	747	10
		165	0.336948	0.5529	0.107716	0.00243488	24.8704	743	10
		166	0.336019	0.55383	0.107716	0.00243488	24.877	738	10
		167	0.335552	0.554297	0.107716	0.00243488	24.8774	733	10
		168	0.33915	0.542662	0.115597	0.00259063	24.9505	731	11
		169	0.316717	0.5904	0.0925775	0.000306307	24.9552	727	10
		170	0.317173	0.582773	0.0997472	0.000306307	25.055	710	10
		171	0.318783	0.574581	0.105557	0.00107986	25.1743	695	9
		172	0.354564	0.557749	0.0867421	0.00094488	25.1965	688	8
		173	0.321581	0.551992	0.123208	0.00321882	25.2552	687	10
		174	0.319037	0.554126	0.122938	0.00389893	25.2773	686	10
		175	0.301536	0.57891	0.119154	0.000399757	25.3008	654	9
		176	0.308239	0.579829	0.111465	0.000467248	25.379	651	9
		177	0.306032	0.57931	0.11419	0.000467248	25.4179	647	9
		178	0.306967	0.567925	0.123296	0.00181189	25.632	637	6
		179	0.314567	0.563304	0.119657	0.00247123	25.7196	635	6
		180	0.307719	0.559063	0.129153	0.00406506	25.7558	634	6
		181	0.339337	0.54544	0.11011	0.00511378	25.774	619	7
		182	0.314469	0.553928	0.128358	0.00324478	25.9719	616	6
		183	0.29188	0.560584	0.142859	0.00467768	25.9797	599	8
		184	0.291755	0.559452	0.143129	0.00566409	26.0282	594	8
		185	0.294014	0.548025	0.152365	0.0055966	26.095	591	8
		186	0.282597	0.562448	0.148538	0.00641688	26.1546	589	8
		187	0.287872	0.543597	0.156611	0.01192	26.2201	576	8
		188	0.302528	0.550253	0.144738	0.00248161	26.3108	575	5
		189	0.296095	0.543462	0.157961	0.00248161	26.4216	572	5
		190	0.303654	0.539231	0.154633	0.00248161	26.4412	568	5
		191	0.279731	0.578002	0.13734	0.00492688	26.444	566	8
		192	0.297139	0.553565	0.146036	0.00326036	26.4451	564	5
		193	0.293889	0.555647	0.145766	0.00469844	26.5275	545	6
		194	0.293936	0.542475	0.157753	0.00583541	26.7921	539	5
		195	0.28702	0.552085	0.156191	0.00470363	26.8134	517	6
		196	0.290712	0.536806	0.168916	0.00356666	27.1073	515	5
		197	0.304101	0.52852	0.153694	0.0136852	27.1574	509	5
		198	0.282872	0.523666	0.192366	0.00109544	27.1952	503	5
		199	0.285551	0.519181	0.177035	0.0182331	27.288	492	5
		200	0.286615	0.53474	0.169642	0.00900232	27.3519	483	4
		201	0.290037	0.542164	0.161995	0.00580426	27.3528	482	4
		202	0.284804	0.537357	0.172036	0.00580426	27.3683	477	4
		203	0.276969	0.536458	0.174839	0.0117331	27.4651	465	4
		204	0.286569	0.525899	0.167353	0.0201799	27.5595	460	5
		205	0.281164	0.530618	0.178556	0.00966166	27.6878	458	4
		206	0.284643	0.536246	0.169201	0.00991086	27.7338	453	4
		207	0.279409	0.531879	0.178349	0.0103625	27.7474	448	4
		208	0.279622	0.529424	0.180592	0.0103625	27.782	443	4
		209	0.273854	0.510542	0.19775	0.0178541	28.3963	441	4
		210	0.274913	0.51266	0.186806	0.0256208	28.4947	435	4
		211	0.280271	0.5067	0.186811	0.0262178	28.5052	418	4
		212	0.274483	0.520105	0.190227	0.0151856	28.5746	417	4
		213	0.263232	0.53582	0.177149	0.0237985	28.6424	406	4
		214	0.265096	0.470587	0.262422	0.00189495	29.2323	398	4
		215	0.278288	0.498289	0.197407	0.0260154	29.3924	397	4
		216	0.268154	0.506227	0.2109	0.0147183	29.4322	393	4
		217	0.266176	0.505366	0.206674	0.0217842	29.4331	386	4
		218	0.267744	0.495751	0.217624	0.018882	29.6049	384	4
		219	0.271025	0.515925	0.185856	0.0271939	29.7785	371	4
		220	0.270506	0.513314	0.187548	0.0286319	29.8935	366	4
		221	0.268221	0.49126	0.209956	0.0305632	30.1731	364	4
		222	0.261052	0.448714	0.272749	0.0174855	30.6334	363	4
		223	0.27658	0.441218	0.258253	0.0239491	30.6678	358	4
		224	0.259567	0.430725	0.264971	0.0447364	31.1314	354	4
		225	0.252496	0.466631	0.21914	0.0617339	31.3911	348	3
		226	0.248073	0.470415	0.228344	0.0531677	31.5819	343	3
		227	0.255393	0.489432	0.221689	0.0334861	31.8913	333	3
		228	0.256826	0.46025	0.232669	0.0502552	32.1577	332	3
		229	0.253737	0.462804	0.233204	0.0502552	32.1818	329	3
		230	0.278916	0.497251	0.198098	0.025735	32.4579	322	3
		231	0.271923	0.478997	0.243774	0.00530587	32.9793	320	3
		232	0.274628	0.443486	0.247377	0.0345089	33.0604	319	3
		233	0.268273	0.44019	0.254142	0.0373955	33.156	318	3
		234	0.262713	0.415374	0.278875	0.0430388	33.2082	317	3
		235	0.264021	0.408713	0.271954	0.0553118	33.2354	314	3
		236	0.278641	0.466496	0.236012	0.0188509	33.4868	312	3
		237	0.272852	0.419086	0.242248	0.0658145	33.7258	308	3
		238	0.268647	0.407679	0.250398	0.0732749	33.7921	307	3
		239	0.28335	0.501716	0.181952	0.0329826	34.7901	302	3
		240	0.278252	0.444405	0.238977	0.0383663	34.8311	300	3
		241	0.276242	0.450651	0.237648	0.035459	34.9593	298	3
		242	0.273989	0.442001	0.244558	0.0394513	35.364	293	3
		243	0.28201	0.502915	0.165541	0.0495335	36.2966	290	3
		244	0.287524	0.433513	0.205698	0.0732646	37.8056	287	3
		245	0.278288	0.387333	0.215765	0.118614	39.8728	286	3
		246	0.292539	0.391248	0.203777	0.112436	39.985	284	3
		247	0.287877	0.39591	0.203777	0.112436	39.9919	283	3
		248	0.285987	0.395214	0.204634	0.114164	40.4944	282	3
		249	0.296495	0.41337	0.201083	0.0890524	42.3191	279	3
		250	0.275697	0.378741	0.250103	0.0954589	43.2508	278	3
		251	0.296781	0.437469	0.210698	0.0550523	43.7779	277	3
		252	0.290815	0.420124	0.235665	0.0533961	46.7536	276	3
