# Supplementary material for: Application of Modified NSGA-II to the Transit Network Design Problem
Source: Hindawi journal article supplement (doi:10.1155/2020/3753601), 2020-08-01
Supplement: f1 [file 3753601.f1.zip › Supportdata/Mumford1/m1_solution_11_44routes.txt]

32 12 69 10 2 27 31 63 25 64 7 36 35 46 37 39 20 67 4 70 24 1 51 44 21 53 65 52 59 34 
69 10 18 21 53 65 59 42 13 5 8 47 
57 52 59 46 23 20 67 4 24 51 44 21 56 17 27 63 
64 22 25 31 27 17 11 29 57 7 48 54 47 41 8 5 26 42 46 23 14 44 18 60 2 50 16 
43 31 64 7 48 54 5 26 42 37 39 70 24 4 
25 22 64 7 36 35 42 37 55 19 40 49 70 24 51 18 60 10 12 32 2 27 9 57 52 58 26 5 54 
33 55 37 46 59 52 9 27 50 43 16 12 60 
30 4 67 39 37 46 59 58 36 35 42 28 68 38 6 33 40 19 55 20 23 34 21 11 56 53 9 27 
3 51 34 59 36 7 22 64 31 27 17 11 18 45 
19 39 20 23 34 21 18 10 12 16 50 27 9 52 58 42 28 68 38 
7 57 9 11 21 44 51 24 30 20 37 42 28 13 41 47 
2 10 60 11 53 65 59 46 37 55 19 40 49 30 24 51 44 62 61 
43 50 2 60 18 51 24 4 70 49 40 66 68 28 42 59 34 44 62 45 
53 65 59 42 13 41 8 5 26 35 52 9 27 17 10 
32 2 17 11 21 34 23 20 66 38 6 68 28 26 5 54 48 
16 31 64 7 48 54 47 8 5 13 42 59 34 51 3 15 
29 57 52 42 37 55 6 19 70 24 3 15 
16 50 2 60 18 21 34 23 39 19 6 68 
1 51 34 59 35 26 5 8 41 48 7 57 9 27 2 69 
13 42 59 65 53 56 17 2 32 12 69 10 18 62 61 45 15 3 51 24 1 70 30 49 
4 39 37 42 13 41 47 8 5 26 28 68 66 33 
5 26 35 52 9 11 60 2 27 31 22 7 36 42 37 20 66 
31 27 17 11 21 34 23 39 67 49 40 33 19 70 24 3 15 45 
58 36 65 53 21 18 61 15 3 1 
54 48 7 57 9 56 21 18 62 15 3 1 70 67 55 
14 21 56 17 27 31 25 64 7 36 42 28 68 
12 2 27 9 52 36 42 37 55 33 19 20 23 34 21 18 60 69 
13 42 37 39 70 1 51 14 34 59 36 7 48 
68 28 42 52 9 27 2 69 60 18 51 24 30 49 40 
3 51 18 11 29 9 52 35 46 37 20 67 49 
37 23 34 44 62 61 18 11 9 57 7 48 8 
63 27 9 52 42 28 68 38 6 55 37 46 59 65 53 
16 50 27 9 53 65 59 46 37 39 70 
62 18 60 2 50 16 31 64 7 48 8 5 13 42 37 39 67 49 
56 53 65 59 42 28 68 6 55 20 23 34 44 62 61 
64 7 57 9 53 21 44 51 1 70 19 68 28 
61 62 44 51 24 70 67 19 66 55 37 42 52 9 27 50 43 
45 15 3 24 70 19 38 66 20 23 34 21 18 60 69 
15 62 18 11 17 27 31 25 63 22 7 48 41 47 
31 27 17 11 18 51 24 70 30 20 37 46 59 65 
65 36 7 48 54 5 13 42 46 23 34 44 62 61 
47 41 48 7 57 9 11 18 61 62 44 34 59 42 26 
32 12 50 63 27 9 52 42 37 55 19 40 
24 51 34 59 58 52 65 53 21 18 62 
