# Supplementary material for: Application of Modified NSGA-II to the Transit Network Design Problem
Source: Hindawi journal article supplement (doi:10.1155/2020/3753601), 2020-08-01
Supplement: f1 [file 3753601.f1.zip › Supportdata/Mumford1/m1_solution_14_43routes.txt]

69 12 10 18 51 24 70 4 49 40 19 55 37 23 34 21 56 9 52 58 26 13 
32 12 69 2 17 27 31 63 25 64 7 36 42 46 37 20 67 4 24 
5 26 35 52 9 27 2 32 10 60 11 53 65 59 58 42 28 68 6 66 38 33 19 70 30 
43 16 50 27 17 56 21 34 23 39 67 
29 9 53 65 59 46 37 55 19 40 49 67 70 1 51 44 21 56 17 27 31 25 
8 41 48 7 22 64 31 16 50 27 9 52 36 42 37 55 33 
15 61 18 51 24 30 49 40 33 66 19 55 37 46 35 52 9 27 2 69 10 60 11 56 53 65 59 58 36 
16 31 64 7 48 54 47 41 13 42 59 34 51 3 15 
64 22 31 27 17 11 29 57 7 48 54 47 41 8 5 13 26 42 46 23 14 44 18 60 2 50 16 43 63 
31 27 9 52 42 28 68 38 19 39 23 34 21 56 11 17 
41 47 8 5 26 28 68 19 40 49 30 4 67 20 37 42 52 
58 36 65 53 21 18 61 45 62 44 14 23 39 19 
45 62 44 34 59 42 13 5 54 48 7 64 25 43 63 16 
14 34 59 36 7 64 22 25 43 50 2 60 18 51 3 
2 27 9 57 7 48 54 5 13 42 37 39 70 1 51 34 59 35 
57 52 59 34 23 20 30 24 51 44 21 56 17 27 63 
10 17 27 9 57 7 48 8 5 26 28 68 6 55 20 23 34 44 62 61 
66 68 28 26 5 54 48 7 57 9 11 18 62 
4 39 37 42 13 41 47 8 5 26 35 36 7 22 
33 55 39 23 34 21 18 10 12 50 63 22 
5 26 35 52 9 11 60 2 27 31 25 64 7 36 42 37 55 19 40 
46 23 14 51 3 15 62 18 11 17 27 31 25 64 7 36 35 42 37 39 67 49 
29 9 52 42 37 39 70 24 51 18 60 2 
38 66 20 23 34 21 18 60 69 12 2 27 9 52 36 42 28 68 
68 19 70 1 3 15 45 18 11 17 27 31 25 64 7 36 42 37 20 30 67 
15 3 24 70 19 6 55 37 42 52 9 27 50 43 
43 16 12 32 2 17 11 53 65 59 46 37 39 70 
47 41 48 7 57 9 27 2 69 60 18 51 24 30 49 40 
61 62 44 51 24 70 67 39 37 42 13 5 8 
66 55 37 42 36 7 64 25 31 27 17 11 18 51 24 70 19 68 
38 68 28 42 52 9 27 63 22 7 48 8 
1 51 34 59 65 53 9 27 50 16 
26 28 42 59 34 44 62 61 18 11 9 57 7 48 41 47 
48 7 36 59 34 51 24 70 39 23 46 35 58 
64 7 57 9 53 21 44 51 24 70 67 55 
15 62 18 21 53 65 36 35 26 5 8 
15 3 1 70 19 66 20 23 34 21 11 17 2 32 
14 21 56 17 27 31 25 64 7 36 42 28 68 
28 68 19 67 70 24 51 18 10 12 
53 65 59 46 37 55 6 38 68 28 13 41 
22 7 36 42 37 39 70 1 3 15 62 18 10 32 
16 50 2 60 18 61 62 44 34 23 20 66 38 
47 8 5 26 28 68 66 33 19 20 23 34 21 18 60 69 
