# Supplementary material for: Application of Modified NSGA-II to the Transit Network Design Problem
Source: Hindawi journal article supplement (doi:10.1155/2020/3753601), 2020-08-01
Supplement: f1 [file 3753601.f1.zip › Supportdata/Mumford1/m1_solution_19_41routes.txt]

32 12 69 10 2 27 31 22 63 25 64 7 36 42 46 37 39 4 70 24 1 51 44 21 53 65 52 59 34 
64 22 25 31 27 17 11 29 57 7 48 54 47 41 8 5 26 42 46 23 14 44 18 60 2 50 16 43 63 
25 22 64 7 36 35 42 37 55 19 40 49 70 24 51 18 60 10 12 32 2 27 9 52 58 26 5 54 
1 51 34 59 36 7 64 22 31 27 2 60 18 45 
69 60 11 53 65 59 46 37 55 6 38 66 20 23 34 44 62 61 
68 19 55 39 20 23 14 44 62 45 61 18 11 29 57 7 48 41 47 
30 70 39 37 42 13 5 54 48 7 57 9 11 18 62 
43 16 50 2 60 18 62 61 45 15 3 51 44 21 56 17 27 63 
16 50 27 9 52 35 46 37 55 33 66 19 20 67 70 1 3 15 
11 56 9 57 7 48 8 5 13 26 28 68 6 55 19 39 23 34 21 18 10 
63 27 17 11 56 21 34 23 39 67 49 
47 54 48 7 64 31 16 50 27 17 11 21 34 23 39 55 19 33 
33 66 68 28 26 5 8 47 41 13 42 37 39 67 30 49 
6 38 68 28 42 52 9 27 50 43 16 12 69 
20 37 42 52 57 29 9 27 50 12 32 
47 41 48 7 57 9 27 2 69 60 18 21 34 23 20 19 33 
13 42 59 65 53 56 17 2 12 10 18 21 34 23 37 
58 59 34 51 3 15 62 18 11 17 27 9 52 42 37 55 19 66 
5 13 42 59 34 44 62 45 15 3 1 70 67 55 
29 9 52 36 42 37 39 4 24 51 18 60 2 50 16 
22 7 48 54 47 8 5 26 35 36 65 53 56 18 62 
32 2 17 11 21 34 23 20 66 55 37 42 36 7 64 25 
69 10 60 18 51 24 30 49 40 66 68 28 26 5 54 48 7 64 25 43 
61 62 44 51 24 70 67 39 37 42 13 5 8 
45 15 3 24 70 19 6 68 28 13 42 52 9 27 2 69 
36 65 53 21 18 61 15 3 51 34 59 42 13 41 47 
14 21 56 17 27 31 25 64 7 36 42 28 68 
65 59 46 37 39 70 24 51 18 11 17 27 31 
25 64 7 36 58 42 37 20 67 49 
16 50 27 9 53 65 59 46 37 20 30 
5 26 35 52 9 11 60 18 21 34 23 20 66 38 19 70 24 3 15 45 
68 28 42 59 65 53 56 21 34 23 39 4 67 19 38 
47 41 13 42 37 39 70 1 51 34 59 52 57 
48 7 36 59 34 14 51 3 15 62 18 10 32 
61 62 44 51 24 30 49 40 19 55 37 46 59 65 53 9 57 7 64 
15 62 18 60 69 2 27 31 25 64 7 36 65 
35 59 34 44 62 61 18 21 53 65 36 58 
67 70 24 51 18 10 12 50 63 22 7 36 42 37 20 30 
60 11 9 52 42 28 68 19 39 23 14 44 62 61 
38 68 28 42 52 9 27 63 22 7 48 8 
43 50 2 60 18 51 24 70 49 67 39 37 46 23 34 44 62 61 
