# Supplementary material for: Application of Modified NSGA-II to the Transit Network Design Problem
Source: Hindawi journal article supplement (doi:10.1155/2020/3753601), 2020-08-01
Supplement: f1 [file 3753601.f1.zip › Supportdata/Mumford1/m1_solution_101_21routes.txt]

32 12 10 17 27 63 25 22 64 7 36 35 42 37 39 4 24 1 51 44 21 53 65 52 59 34 
69 60 11 53 65 59 46 37 55 33 6 19 38 66 20 39 23 14 44 62 45 
4 30 70 39 37 42 13 5 54 48 7 36 59 35 52 9 11 56 18 62 
64 22 25 31 27 17 11 29 57 7 48 54 47 41 8 5 26 42 46 23 14 44 18 60 2 50 16 43 63 
3 51 44 21 11 17 27 31 63 25 64 7 36 59 34 23 14 
49 67 20 37 42 36 52 57 9 27 2 12 69 10 60 18 21 34 23 39 55 33 
47 8 41 13 42 59 34 51 3 15 
58 36 65 53 21 18 61 62 44 34 59 42 13 26 35 52 9 27 2 32 
6 55 37 42 36 7 64 25 31 27 17 11 18 45 15 3 1 70 67 20 19 68 
47 8 5 26 13 28 68 66 33 19 55 37 42 52 9 27 50 43 
8 54 5 26 35 52 9 27 2 10 18 51 24 30 49 40 19 55 37 42 58 36 7 22 25 43 16 50 12 
6 66 55 37 46 59 52 57 29 9 27 50 
53 65 59 46 37 55 6 38 68 28 42 52 9 27 31 63 
15 3 1 70 19 66 20 23 34 21 11 17 2 32 
61 62 44 51 24 70 49 67 39 23 14 21 56 17 27 31 25 
8 48 7 57 9 56 18 62 15 3 51 14 23 46 
41 48 7 64 31 16 43 50 2 60 18 51 24 70 
65 53 9 27 50 16 12 10 18 21 34 23 37 
48 54 5 26 28 68 38 66 40 49 
47 41 5 26 58 59 34 51 3 15 
40 49 30 24 3 15 45 61 62 44 14 23 39 19 68 
