# Supplementary material for: Application of Modified NSGA-II to the Transit Network Design Problem
Source: Hindawi journal article supplement (doi:10.1155/2020/3753601), 2020-08-01
Supplement: f1 [file 3753601.f1.zip › Supportdata/Mumford1/m1_solution_103_21routes.txt]

24 1 51 44 21 56 17 27 31 25 64 7 36 35 42 37 39 67 49 4 70 30 20 
43 25 22 7 48 54 5 26 42 37 39 4 1 3 51 14 
58 42 35 59 65 53 21 18 61 45 62 44 14 23 39 20 55 19 68 
63 27 9 53 65 59 46 37 55 19 40 49 4 24 3 15 45 
33 66 6 68 28 42 35 52 9 56 11 53 65 36 58 59 
3 1 51 44 34 59 42 26 5 8 48 7 57 9 56 18 45 61 
54 47 41 8 5 13 42 46 23 14 21 56 17 27 50 16 63 
5 26 58 36 52 9 27 17 10 69 60 18 44 34 23 20 55 6 38 
29 9 52 36 35 46 37 20 67 70 24 51 44 18 11 17 27 31 63 22 
40 19 55 37 42 52 9 27 50 43 31 16 12 32 
35 59 34 44 62 61 18 11 29 57 52 42 37 39 4 
15 3 51 34 23 46 42 13 41 47 8 5 26 28 68 38 66 33 
22 7 36 42 37 55 66 19 70 1 3 51 34 59 52 57 
68 28 42 52 9 27 2 69 10 60 11 53 65 59 46 
30 20 37 42 13 41 47 54 48 7 57 9 27 2 12 10 18 51 24 70 49 40 
33 55 39 23 34 21 18 10 12 16 31 64 7 48 41 
32 2 17 11 21 34 23 20 66 38 19 70 24 51 14 
32 2 27 9 52 35 26 5 13 42 37 39 70 1 51 34 59 36 7 48 
6 19 70 24 3 15 62 18 11 17 27 31 25 64 7 36 42 28 68 38 
30 24 51 18 60 2 50 43 16 12 69 
56 53 65 59 42 13 28 68 66 40 49 
