# Supplementary material for: Application of Modified NSGA-II to the Transit Network Design Problem
Source: Hindawi journal article supplement (doi:10.1155/2020/3753601), 2020-08-01
Supplement: f1 [file 3753601.f1.zip › Supportdata/Mumford1/m1_solution_105_21routes.txt]

32 12 69 10 2 27 31 22 63 25 64 7 36 42 46 37 39 4 70 24 1 51 44 21 53 65 52 59 34 
64 22 25 31 27 17 11 29 57 7 48 54 47 41 8 5 26 42 46 23 14 44 18 60 2 50 16 43 63 
25 22 64 7 36 35 42 37 55 19 40 49 70 24 51 18 60 10 12 32 2 27 9 52 58 26 5 54 
1 51 34 59 36 7 64 22 31 27 2 60 18 45 
69 60 11 53 65 59 46 37 55 6 38 66 20 23 34 44 62 61 
68 19 55 39 20 23 14 44 62 45 61 18 11 29 57 7 48 41 47 
30 20 37 42 13 5 54 48 7 57 9 11 18 62 
43 16 50 2 60 18 62 61 45 15 3 51 44 21 56 17 27 63 
16 50 27 9 52 35 46 37 55 33 66 19 20 67 70 1 3 15 
11 56 9 57 7 48 8 5 13 26 28 68 6 55 19 39 23 34 14 44 18 10 
47 54 48 7 64 31 16 50 27 17 11 21 34 23 39 55 19 33 
33 66 68 28 26 5 8 47 41 13 42 37 39 67 30 49 
6 38 68 28 42 52 9 27 50 43 16 12 69 
30 20 37 42 52 57 29 9 27 50 12 32 
47 41 48 7 57 9 27 2 69 60 18 21 34 23 20 19 33 
13 42 59 65 53 56 17 2 12 10 18 21 34 23 37 
36 65 53 21 18 61 15 3 51 34 59 42 13 41 47 
14 21 56 17 27 31 25 64 7 36 42 28 68 
65 59 46 37 39 70 24 51 18 11 17 27 31 
25 64 7 36 58 42 37 20 67 49 
16 50 27 9 53 65 59 46 37 55 19 40 49 30 24 51 44 62 61 
