# Supplementary material for: Application of Modified NSGA-II to the Transit Network Design Problem
Source: Hindawi journal article supplement (doi:10.1155/2020/3753601), 2020-08-01
Supplement: f1 [file 3753601.f1.zip › Supportdata/Mumford1/m1_solution_113_19routes.txt]

30 4 20 39 37 42 13 5 54 48 7 57 9 56 18 62 
29 9 52 36 65 53 56 21 18 61 15 3 51 14 23 46 42 13 41 47 54 8 
64 22 25 31 27 17 11 29 57 7 48 54 47 41 8 5 13 26 35 59 34 14 44 18 60 2 50 16 43 63 
32 12 69 10 18 51 24 70 67 39 23 14 
1 70 49 67 20 37 42 36 52 57 9 27 2 32 12 69 10 60 18 21 34 23 39 55 33 
63 27 9 52 36 58 42 26 28 68 38 6 55 20 23 34 21 56 17 2 32 
68 28 42 35 36 52 9 27 2 69 10 50 63 22 7 48 41 47 
15 62 45 18 11 17 27 31 25 64 7 36 35 46 37 55 19 66 
54 48 7 57 9 11 18 45 15 3 24 30 49 40 19 6 68 28 26 5 8 47 41 13 
12 60 18 51 24 4 39 37 42 52 9 27 50 16 
63 27 17 56 21 44 51 1 70 19 38 68 28 26 5 8 47 
62 44 51 24 30 70 39 37 46 59 65 53 11 60 69 
16 50 27 9 53 65 59 46 37 55 19 33 66 68 28 13 41 
37 23 34 44 62 61 18 21 53 65 59 42 13 41 47 
1 51 34 59 36 7 64 31 16 12 
3 51 18 60 2 50 16 31 64 7 48 54 5 26 35 52 9 27 17 10 
28 42 59 34 44 62 45 15 3 1 70 19 68 
2 17 11 21 34 23 39 19 40 66 38 68 28 42 52 9 27 50 43 
15 3 51 34 59 58 26 5 41 47 
