# Supplementary material for: Application of Modified NSGA-II to the Transit Network Design Problem
Source: Hindawi journal article supplement (doi:10.1155/2020/3753601), 2020-08-01
Supplement: f1 [file 3753601.f1.zip › Supportdata/Mumford1/m1_solution_118_18routes.txt]

69 12 10 18 51 24 70 4 49 40 19 55 37 23 14 21 56 9 52 58 26 13 
32 12 69 2 60 18 62 44 21 56 17 27 31 63 25 64 7 36 42 46 37 20 67 4 24 
24 70 39 37 42 13 5 54 47 41 8 48 7 57 9 56 18 62 
45 61 62 44 34 59 35 26 5 41 13 42 37 39 67 4 49 30 
5 26 35 52 9 27 2 32 10 69 60 11 53 65 59 58 42 28 68 6 66 38 19 70 30 
43 16 12 60 18 21 34 23 20 66 
43 50 27 17 11 56 21 34 23 39 67 
6 19 70 24 3 15 45 18 11 17 27 31 22 
29 9 53 65 59 46 37 55 19 40 49 67 70 1 51 44 21 56 17 27 31 25 
41 48 7 22 64 31 16 50 27 9 52 36 42 37 55 33 
15 61 62 44 51 24 30 49 40 33 66 19 55 37 46 35 52 9 27 2 69 10 60 11 56 53 65 59 58 36 
16 31 64 7 48 54 47 41 13 42 59 34 51 3 15 
64 22 25 31 27 17 11 29 57 7 48 54 47 41 8 5 13 26 42 46 23 14 44 18 60 2 50 16 43 63 
31 27 9 52 42 28 68 38 19 39 23 34 21 53 11 17 
25 64 7 36 35 26 28 68 6 55 20 23 34 21 56 17 2 32 
3 51 18 60 2 50 43 25 64 7 48 54 5 
47 8 5 26 28 68 19 40 49 30 20 37 42 52 57 
52 65 53 21 18 61 62 44 14 34 59 36 7 22 
