# Supplementary material for: Application of Modified NSGA-II to the Transit Network Design Problem
Source: Hindawi journal article supplement (doi:10.1155/2020/3753601), 2020-08-01
Supplement: f1 [file 3753601.f1.zip › Supportdata/Mumford1/m1_solution_126_16routes.txt]

57 52 59 34 23 20 30 24 51 44 21 56 17 27 63 
45 15 61 18 51 24 30 49 40 33 66 19 55 37 46 35 52 9 27 2 69 10 60 11 56 53 65 59 58 36 
13 42 52 57 29 11 17 2 32 12 69 10 18 62 61 45 15 3 1 70 67 55 6 38 
28 26 35 58 36 59 34 51 1 70 39 37 42 13 5 54 
32 2 17 27 31 63 25 64 7 36 35 46 37 20 67 4 24 1 3 51 44 62 
33 55 20 23 34 21 56 17 27 31 64 7 36 42 37 39 70 
64 22 25 31 27 17 11 29 57 7 48 54 47 41 5 13 26 42 46 23 14 44 18 60 2 50 16 43 63 
58 36 65 53 21 18 61 62 44 34 23 20 66 38 68 28 42 52 9 27 50 43 
41 48 7 57 9 11 18 45 15 3 24 30 49 40 19 55 37 46 59 65 53 
38 19 39 23 34 21 18 60 69 10 12 16 50 27 9 53 65 
12 2 27 9 52 58 26 5 54 48 7 22 63 
43 50 2 60 18 51 24 70 4 49 40 33 66 6 68 28 26 5 8 47 
47 41 13 42 59 34 51 3 15 62 18 11 17 27 31 64 
8 48 7 64 31 16 50 27 17 11 21 34 23 39 67 
56 53 65 59 42 28 68 19 70 24 51 
32 2 27 9 52 36 42 37 23 34 44 62 61 
