# Supplementary material for: Application of Modified NSGA-II to the Transit Network Design Problem
Source: Hindawi journal article supplement (doi:10.1155/2020/3753601), 2020-08-01
Supplement: f1 [file 3753601.f1.zip › Supportdata/Mumford1/m1_solution_145_12routes.txt]

32 2 17 11 56 21 34 23 39 19 33 
16 50 27 9 57 52 42 37 39 70 1 3 51 14 
20 55 33 66 6 38 68 28 42 35 52 9 27 2 12 10 60 11 53 65 36 58 59 46 
63 27 9 53 65 59 46 37 39 70 24 3 15 45 
1 51 44 21 56 17 27 31 25 64 7 36 35 46 37 39 67 49 4 70 30 20 
15 3 51 34 59 42 26 5 8 48 7 36 65 52 57 9 56 18 62 45 61 
64 31 27 17 11 9 29 57 7 48 54 47 41 8 5 13 42 46 23 14 44 18 60 2 50 16 63 22 25 43 
5 26 58 36 52 9 27 17 10 69 60 18 21 34 23 20 55 6 38 
29 57 7 22 63 16 43 50 27 9 52 59 46 37 55 19 40 49 30 24 51 18 60 69 12 32 
14 34 59 36 65 53 21 18 45 15 
35 59 34 44 62 61 18 11 29 57 52 42 37 39 20 67 4 
47 41 13 26 28 68 6 66 19 70 24 51 18 60 2 50 
