# Supplementary material for: Application of Modified NSGA-II to the Transit Network Design Problem
Source: Hindawi journal article supplement (doi:10.1155/2020/3753601), 2020-08-01
Supplement: f1 [file 3753601.f1.zip › Supportdata/Mumford1/m1_solution_176_9routes.txt]

32 2 17 11 21 34 23 39 19 33 
29 9 27 50 16 43 25 22 64 7 48 54 5 13 42 37 39 70 1 3 51 14 
63 27 9 53 65 59 46 37 55 19 40 49 30 24 3 15 45 62 
33 66 6 38 68 28 42 35 52 9 27 2 12 60 11 53 65 36 58 59 
1 51 44 21 56 17 27 31 25 64 7 36 42 37 39 67 49 4 
15 3 51 34 59 42 26 5 8 48 7 57 9 56 18 61 45 
48 54 5 26 28 68 38 66 19 39 67 4 24 51 18 60 2 50 16 
47 41 5 26 35 52 9 27 17 10 69 60 18 21 34 23 20 55 6 
47 41 13 42 46 23 14 44 62 45 
