# Supplementary material for: Application of Modified NSGA-II to the Transit Network Design Problem
Source: Hindawi journal article supplement (doi:10.1155/2020/3753601), 2020-08-01
Supplement: f1 [file 3753601.f1.zip › Supportdata/Mumford1/m1_solution_188_5routes.txt]

64 22 25 31 27 17 11 9 29 57 7 48 54 47 41 8 5 13 42 46 23 14 44 18 60 2 50 16 43 63 
9 53 65 52 36 35 42 26 28 68 66 38 6 55 20 39 23 34 21 56 11 18 45 15 3 1 70 19 33 40 
61 62 44 51 24 30 49 40 33 66 19 55 37 42 58 52 9 27 2 69 10 18 21 34 59 35 36 65 53 56 
69 10 12 32 2 60 18 62 15 3 51 44 21 56 11 17 27 31 63 25 64 7 36 42 37 20 67 4 24 1 
69 12 10 18 51 24 70 4 49 40 19 55 37 46 59 65 53 56 9 52 58 26 13 
