# Supplementary material for: Application of Modified NSGA-II to the Transit Network Design Problem
Source: Hindawi journal article supplement (doi:10.1155/2020/3753601), 2020-08-01
Supplement: f1 [file 3753601.f1.zip › Supportdata/Mumford1/m1_solution_193_6routes.txt]

66 33 55 67 30 24 3 15 45 61 62 18 11 56 53 65 52 36 35 58 
25 64 7 36 42 37 55 19 40 49 70 24 51 18 60 10 32 2 27 9 57 52 35 58 26 5 54 
32 12 69 10 2 27 9 52 35 46 37 20 67 4 24 1 3 51 44 21 53 65 59 34 
64 22 25 31 27 17 11 29 57 7 48 54 47 41 8 5 13 26 42 46 23 14 44 18 60 2 50 16 43 63 
16 50 27 9 52 36 42 28 68 6 38 19 39 23 34 21 18 10 12 32 
8 48 7 22 63 27 17 11 21 34 23 39 67 
