# Supplementary material for: Application of Modified NSGA-II to the Transit Network Design Problem
Source: Hindawi journal article supplement (doi:10.1155/2020/3753601), 2020-08-01
Supplement: f1 [file 3753601.f1.zip › Supportdata/Mumford1/m1_solution_195_6routes.txt]

64 22 25 31 27 17 11 29 57 7 48 54 47 41 8 5 26 42 46 23 14 44 18 60 2 50 16 43 63 
28 13 42 52 9 27 2 32 12 10 69 60 18 51 3 1 70 4 67 20 30 49 
32 12 10 69 2 17 27 31 63 25 64 7 36 42 37 20 67 4 24 1 
53 65 59 46 37 55 19 40 49 70 1 51 44 21 56 17 27 31 25 
9 53 65 52 36 35 26 28 68 66 38 6 55 20 39 23 34 21 56 11 18 45 15 3 1 70 19 33 40 
58 36 65 53 21 18 61 62 44 34 59 35 
